# Supplementary material for: Synthesis, Characterization, and Antimicrobial Activity Screening of Some Novel 3-(2-(3-(Substituted benzyloxy)oxetan-3-yl)-3-fluorophenoxy)-8-fluoro-2-methylquinoline Derivatives as Potential Antimycobacterial Agents
Source: PubMed Central journal article supplement — ACS Omega. 2022 Dec 6;7(50):47096–107. doi: 10.1021/acsomega.2c06245 (PMC9773968; doi:10.1021/acsomega.2c06245), 2022-12-06
Supplement: ao2c06245_si_001.pdf [file ao2c06245_si_001.pdf]

# Synthesis, characterization and antimicrobial activity screening of some novel 3-(2-(3-(substituted benzyloxy)oxetan-3-yl)-3-fluorophenoxy)-8-fluoro-2-methylquinoline derivatives as potential antimycobacterial agents

Abhijit Shinde,<sup>a</sup> Sandip R. Ugale,<sup>a</sup> Yogesh Nandurkar,<sup>a,b</sup> Manisha Modak<sup>c</sup> Abhijit P. Chavan,<sup>a</sup> Pravin C. Mhaske<sup>a\*</sup>

<sup>a</sup>Post-Graduate Department of Chemistry, S. P. Mandali's Sir Parashurambhau College, Tilak Road, Pune, India 411 030, (Affiliated to Savitribai Phule Pune University).

<sup>b</sup>Department of Chemistry, Nowrosjee Wadia College, Pune, India (Affiliated to Savitribai Phule Pune University).

<sup>c</sup>Department of Zoology, S. P. Mandali's Sir Parashurambhau College, Tilak Road, Pune, India 411 030, (Affiliated to Savitribai Phule Pune University).

## Corresponding author

Pravin C. Mhaske (E-mail: [mhaskepc18@gmail.com](mailto:mhaskepc18@gmail.com))

## [Index](#)

|                                                                                                             |                    |
|-------------------------------------------------------------------------------------------------------------|--------------------|
| <a href="#">Table S1</a> Antimicrobial activity in the zone of inhibition (mm) of compounds ( <b>9a-i</b> ) | <a href="#">S2</a> |
| <b>Figure S1</b> : Cytotoxicity of compounds <b>9a-I</b>                                                    | <b>S2</b>          |
| <b>Figures S2 and S3</b> : Spectral Data of Compound <b>6</b>                                               | <b>S3</b>          |
| <b>Figures S4 and S5</b> : Spectral Data of Compound <b>7</b>                                               | <b>S4-S5</b>       |
| <b>Figures S6 to S28</b> : Spectral data of Compound <b>9a-i</b>                                            | <b>S6-S27</b>      |

**Table S1:** Antimicrobial activity in the zone of inhibition (mm) of compounds (**9a-i**)

| Comp.               | R                                                | <i>P. mirabilis</i> | <i>E. coli</i> | <i>B. subtilis</i> | <i>S. albus</i> | <i>C. albicans</i> | <i>A. niger</i> |
|---------------------|--------------------------------------------------|---------------------|----------------|--------------------|-----------------|--------------------|-----------------|
| <b>9a</b>           | C <sub>6</sub> H <sub>5</sub>                    | 16.2                | 11.8           | 16                 | 12.6            | 13.2               | 16.6            |
| <b>9b</b>           | 4-BrC <sub>6</sub> H <sub>4</sub>                | 15.0                | 12.2           | 12.3               | 15.4            | 13.4               | 15.6            |
| <b>9c</b>           | 4-ClC <sub>6</sub> H <sub>4</sub>                | 15.6                | 12.4           | 12.6               | 13.8            | 11.0               | 14.6            |
| <b>9d</b>           | 4-CH <sub>3</sub> C <sub>6</sub> H <sub>4</sub>  | 15.6                | 11.2           | 12.5               | 13.2            | 11.2               | 16              |
| <b>9e</b>           | 2-CNC <sub>6</sub> H <sub>4</sub>                | 17.0                | 14.0           | 11.2               | 12.4            | 12.4               | 15              |
| <b>9f</b>           | 3-CNC <sub>6</sub> H <sub>4</sub>                | 20.6                | 13.5           | 13.3               | 14.2            | 13.0               | 15.4            |
| <b>9g</b>           | 4-CNC <sub>6</sub> H <sub>4</sub>                | 14.4                | 12.2           | 10.0               | 13.4            | 13.5               | 15.8            |
| <b>9h</b>           | 3,5-F <sub>2</sub> C <sub>6</sub> H <sub>3</sub> | 17.8                | 12.4           | 13.6               | 13.2            | 13.8               | 15.8            |
| <b>9i</b>           | 6-PPyridin-3-yl                                  | 14.4                | 11.25          | 13.8               | 13.8            | 12.6               | 15.8            |
| <b>Streptomycin</b> |                                                  | 21.0                | 25.0           | 21.6               | 21.6            | 21.0               | NA              |
| <b>Fluconazole</b>  |                                                  | NA                  | NA             | NA                 | NA              | NA                 | 20.2            |
| <b>Ravuconazole</b> |                                                  | NA                  | NA             | NA                 | NA              | NA                 | 28.6            |

NA = Not applicable

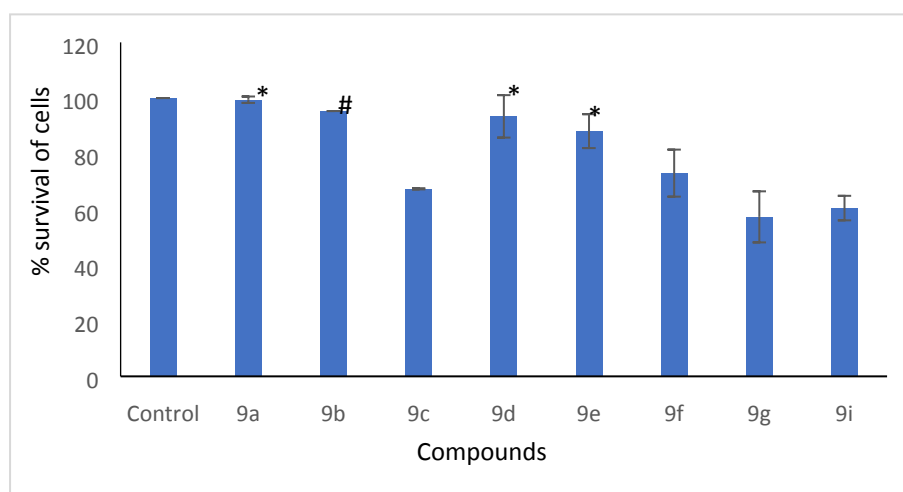**Figure S1:** Cytotoxicity of compounds **9a-i**. (\*: Statistically not significant as compared to control, #: Statistically significant as compared to control)

Representative Spectral data: **Figures S2 to S28**

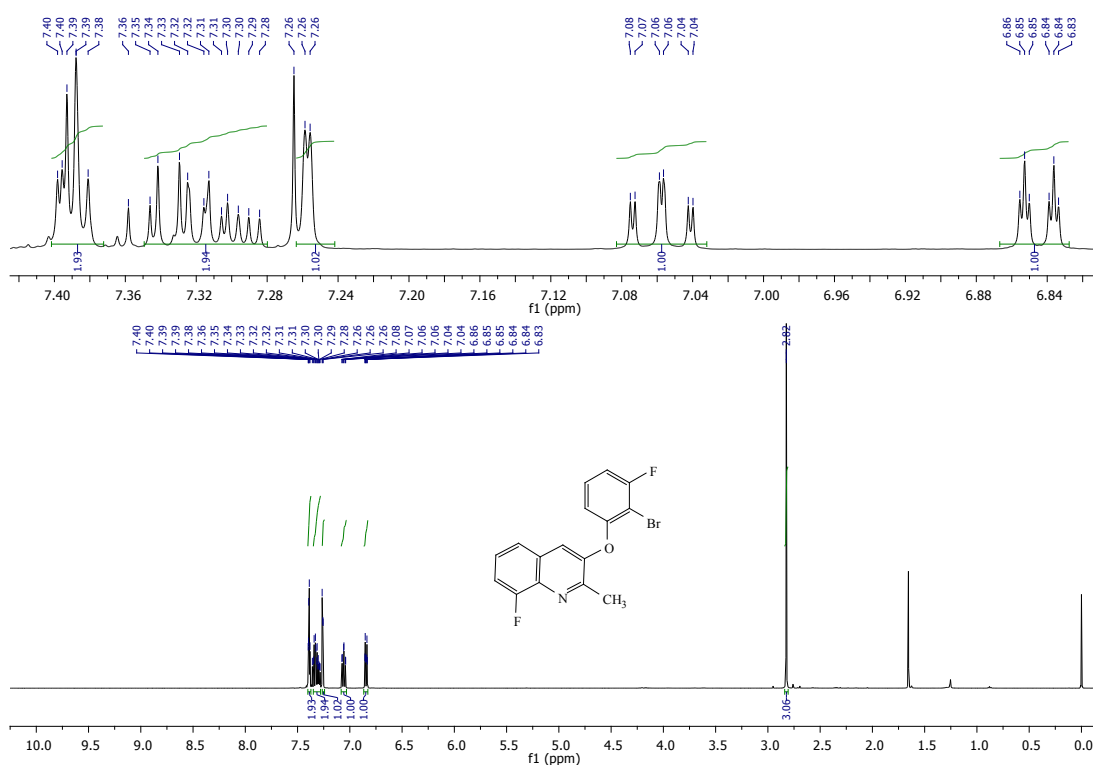

**Figure S2:**  $^1\text{H}$  NMR (500 MHz,  $\text{CDCl}_3$ ) spectrum of 3-(2-bromo-3-fluorophenoxy)-8-fluoro-2-methylquinoline, **6**

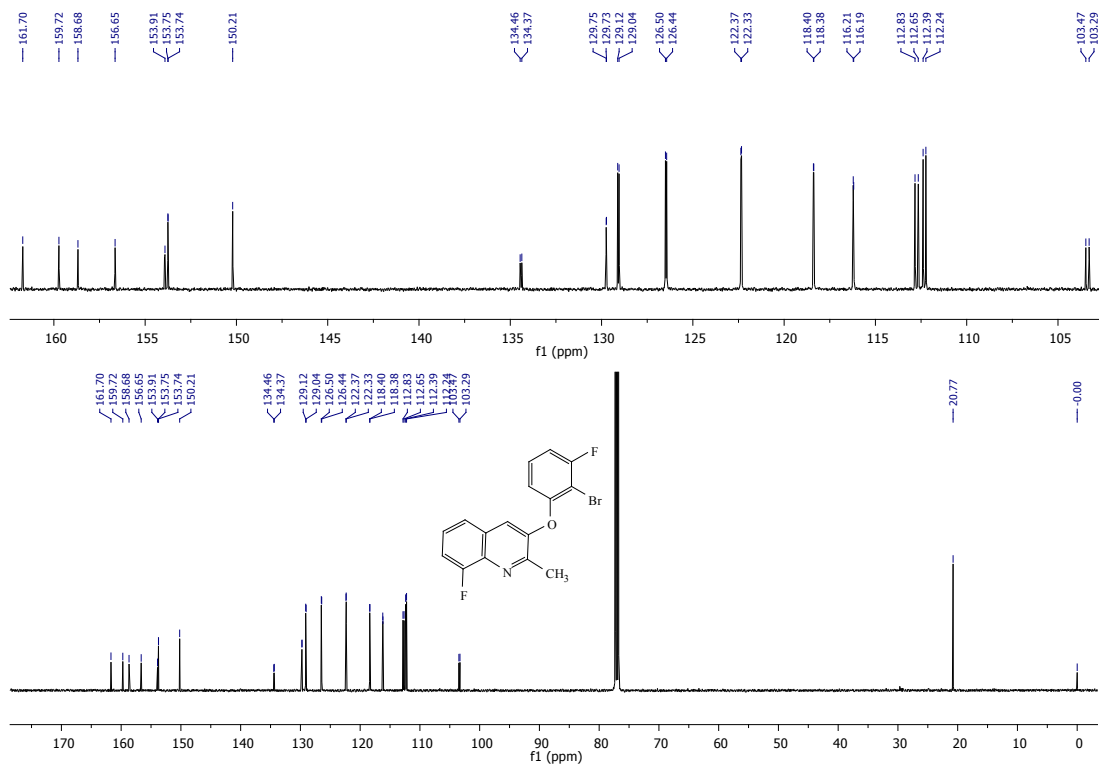

**Figure S3:**  $^{13}\text{C}$  NMR (126 MHz,  $\text{CDCl}_3$ ) spectrum of 3-(2-bromo-3-fluorophenoxy)-8-fluoro-2-methylquinoline, **6**

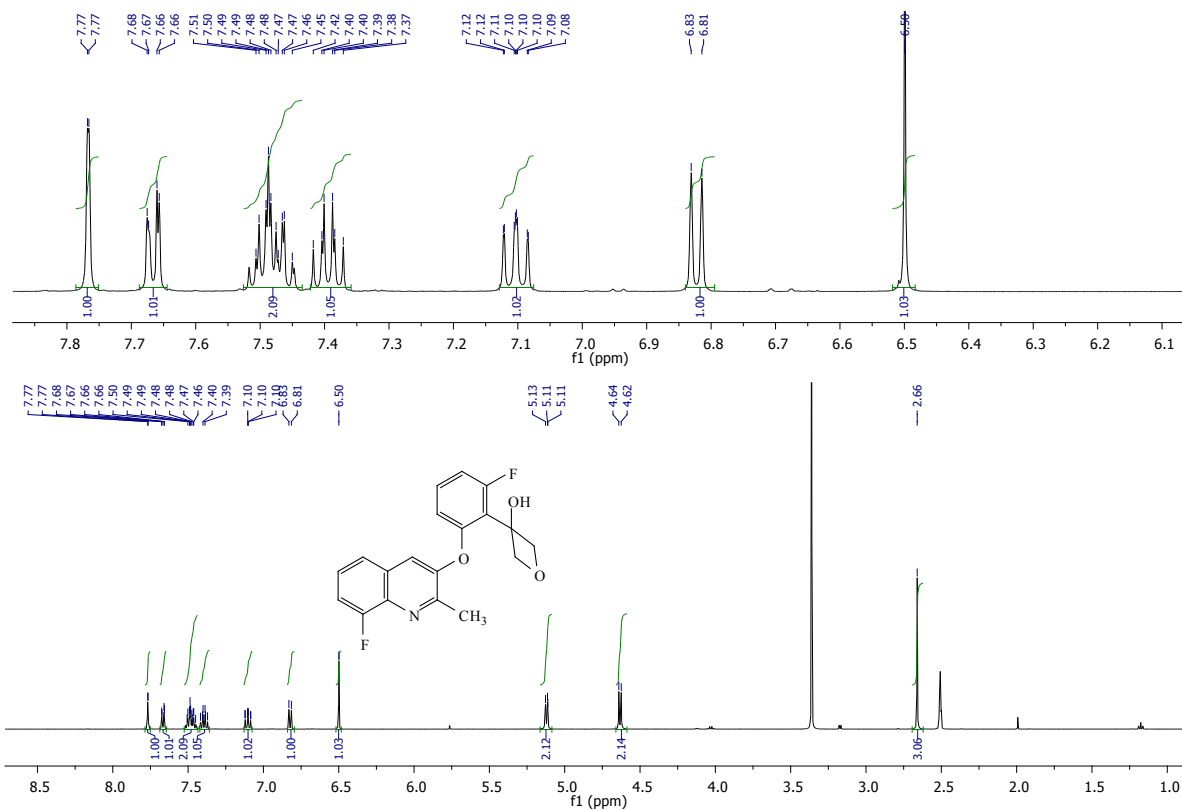

**Figure S4:**  $^1\text{H}$  NMR (500 MHz,  $\text{CDCl}_3$ ) spectrum of 3-(2-fluoro-6-((8-fluoro-2-methylquinolin-3-yl)oxy)phenyl)oxetan-3-ol, **7**

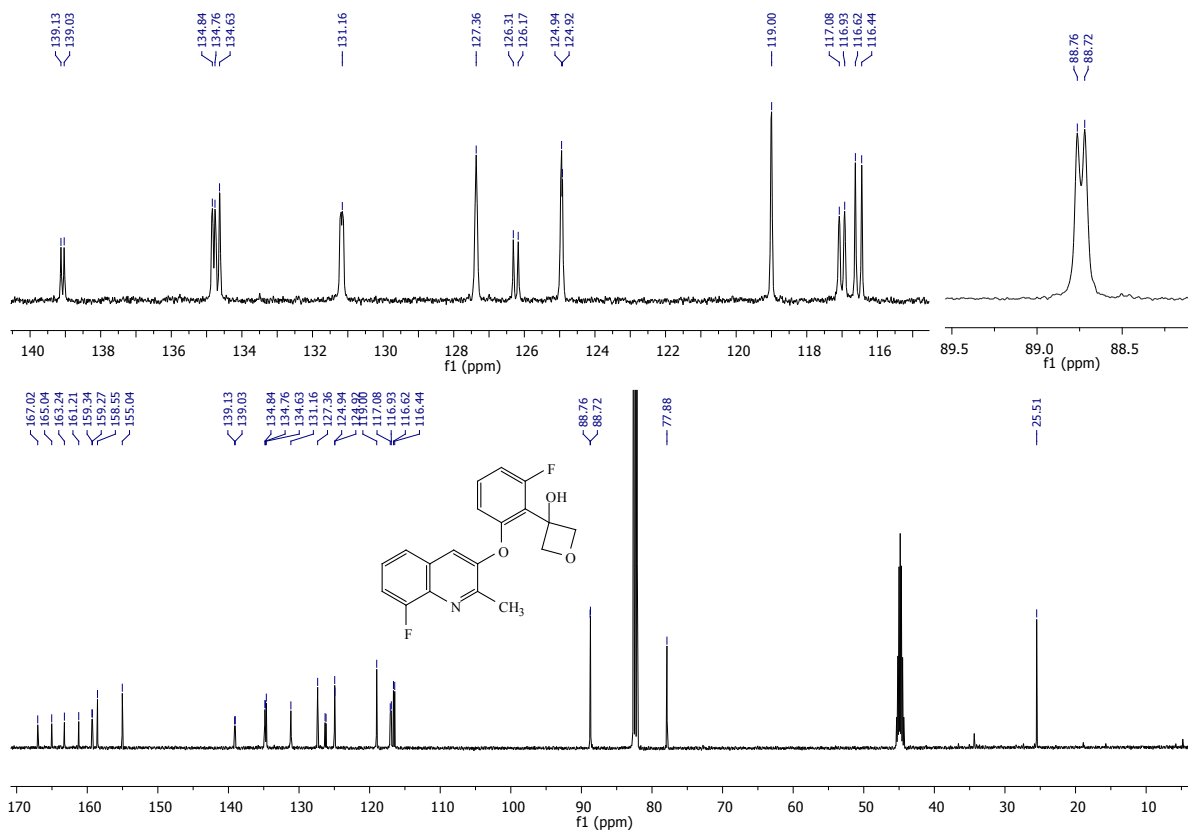

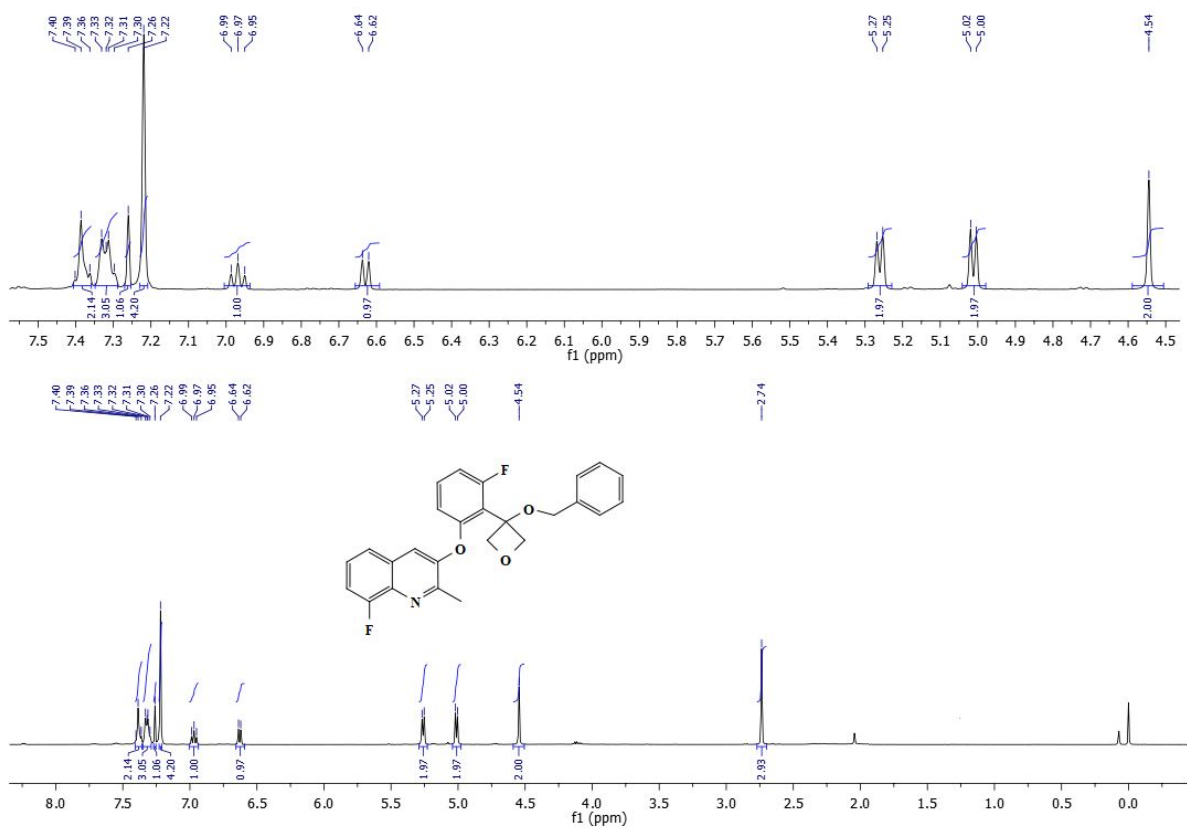

**Figure S6:** <sup>1</sup>H NMR (500 MHz, CDCl<sub>3</sub>) spectrum of 3-(2-(3-(benzyloxy)oxetan-3-yl)-3-fluorophenoxy)-8-fluoro-2-methylquinoline, **9a**

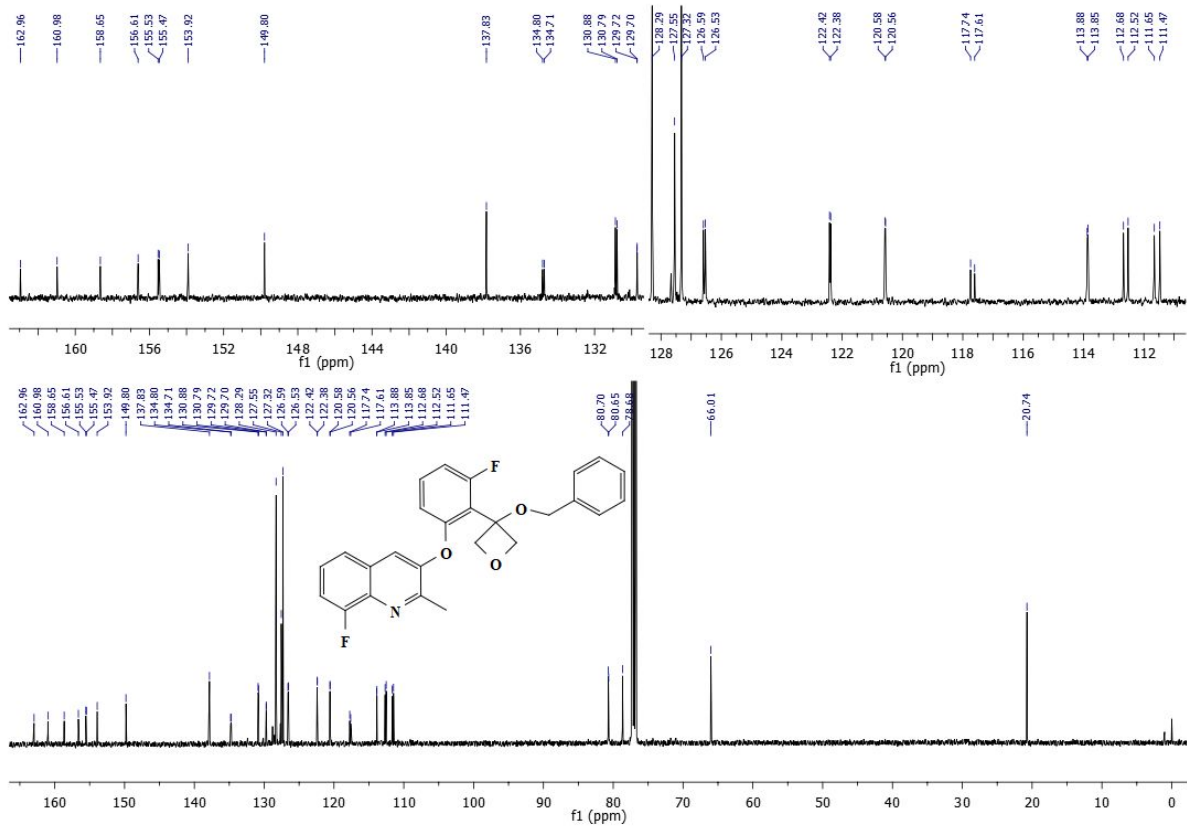

**Figure S7:** <sup>13</sup>C NMR (126 MHz, CDCl<sub>3</sub>) spectrum of 3-(2-(3-(benzyloxy)oxetan-3-yl)-3-fluorophenoxy)-8-fluoro-2-methylquinoline, **9a**

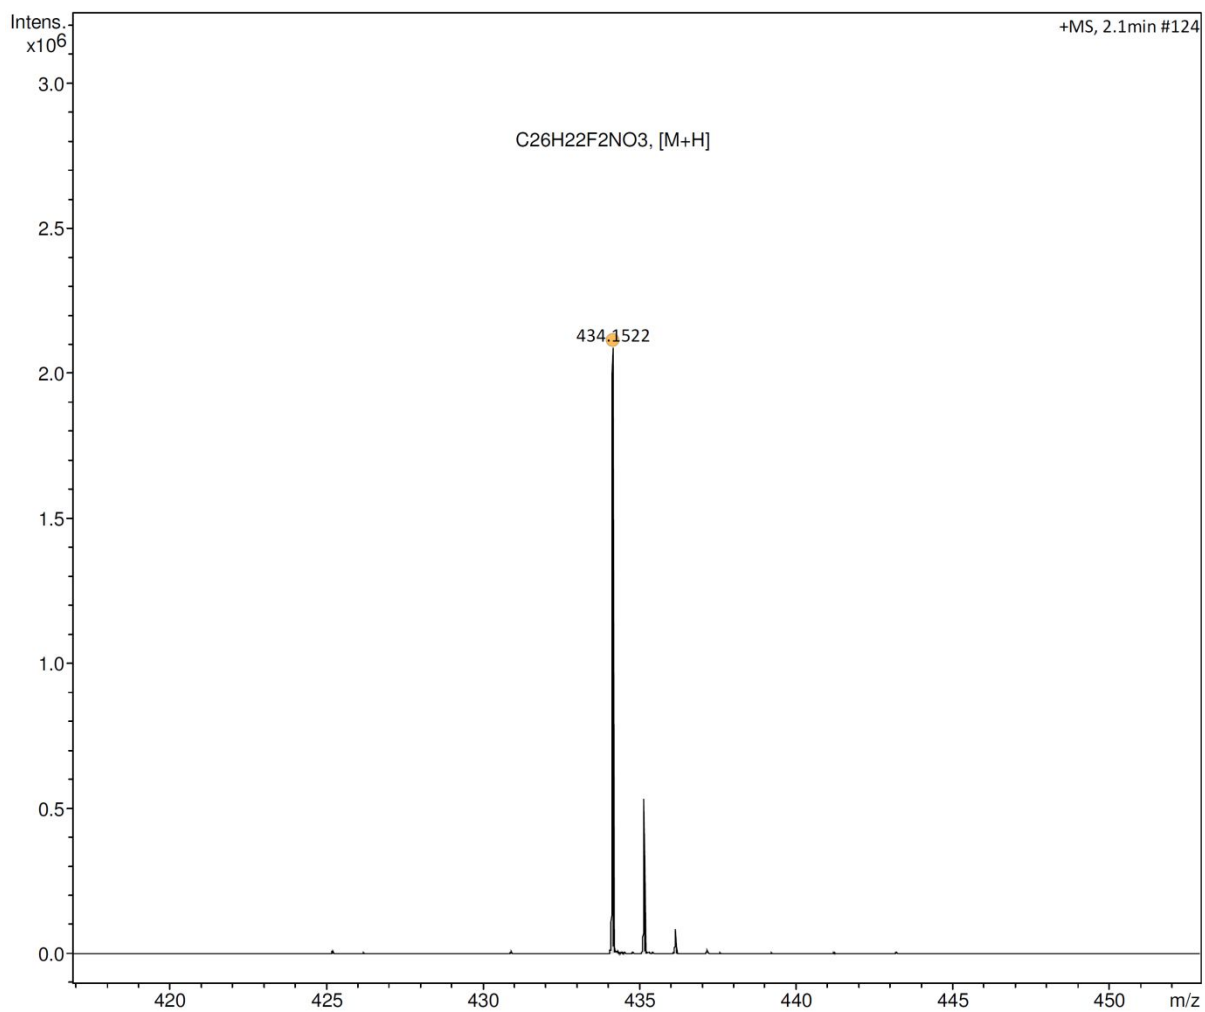

**Figure S8:** HRMS spectrum of 3-(2-(3-(benzyloxy)oxetan-3-yl)-3-fluorophenoxy)-8-fluoro-2-methylquinoline, **9a**



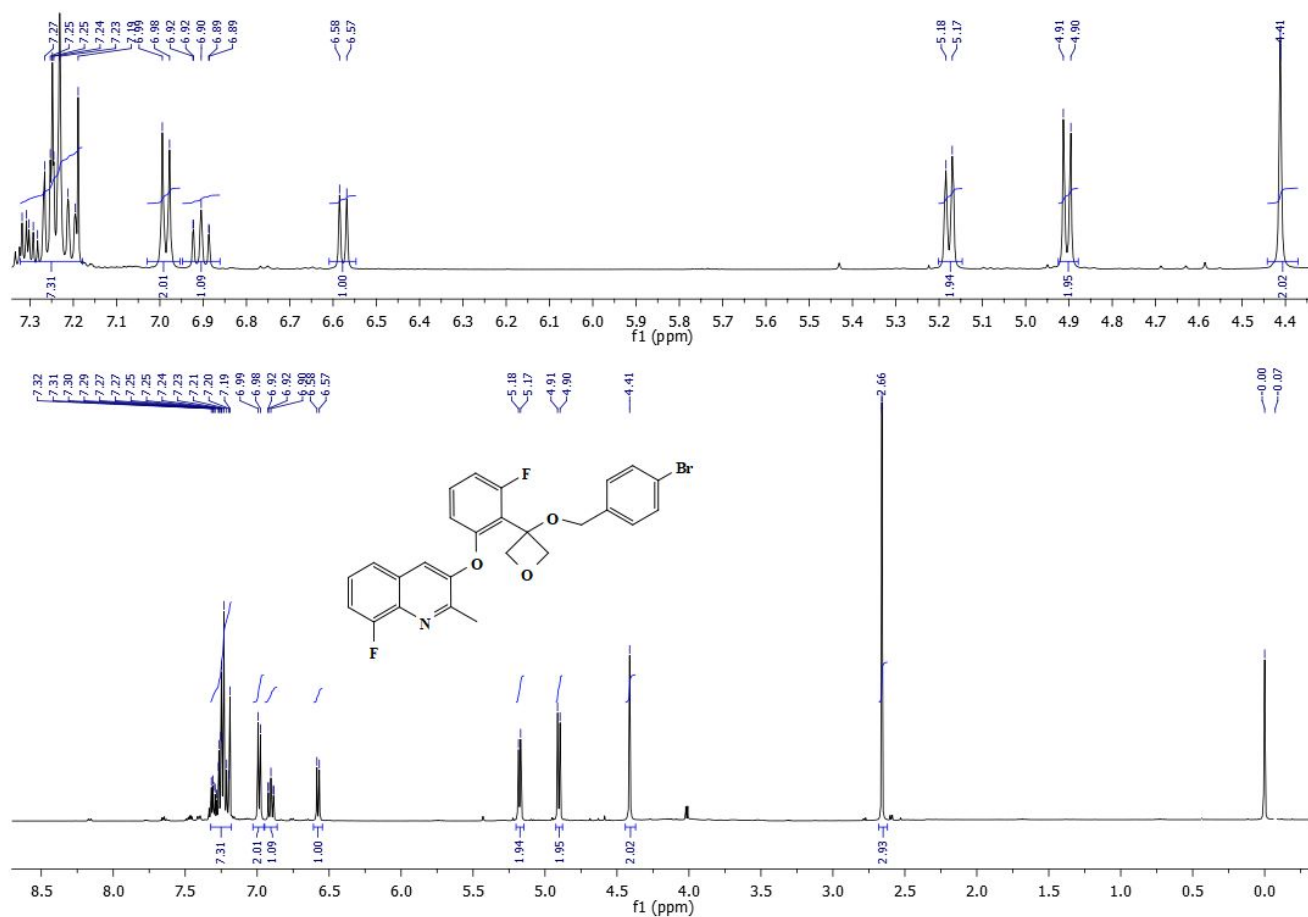

**Figure S9:**  $^1\text{H}$  NMR (500 MHz,  $\text{CDCl}_3$ ) spectrum of 3-(2-(3-((4-bromobenzyl)oxy)oxetan-3-yl)-3-fluorophenoxy)-8-fluoro-2-methylquinoline, **9b**

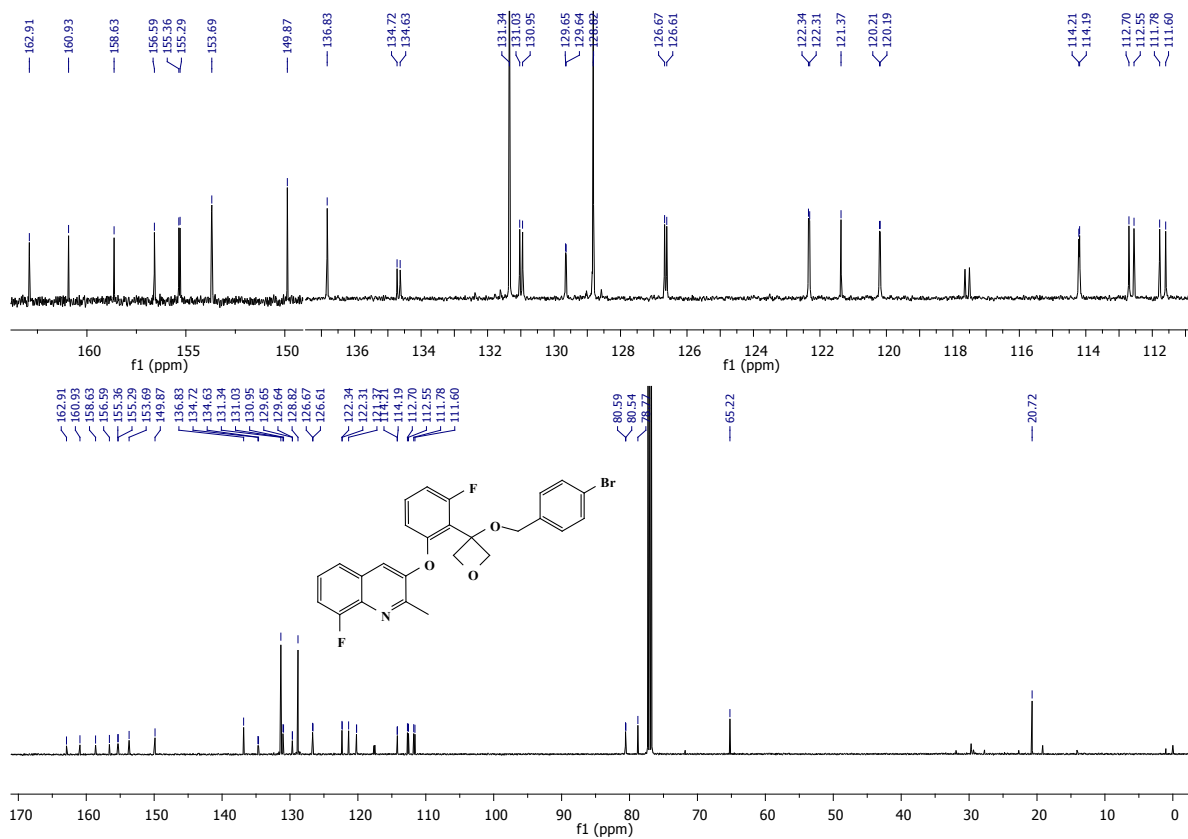

**Figure S10:** <sup>13</sup>C NMR (126 MHz, CDCl<sub>3</sub>) spectrum of 3-(2-(3-((4-bromobenzyl)oxy)oxetan-3-yl)-3-fluorophenoxy)-8-fluoro-2-methylquinoline, **9b**

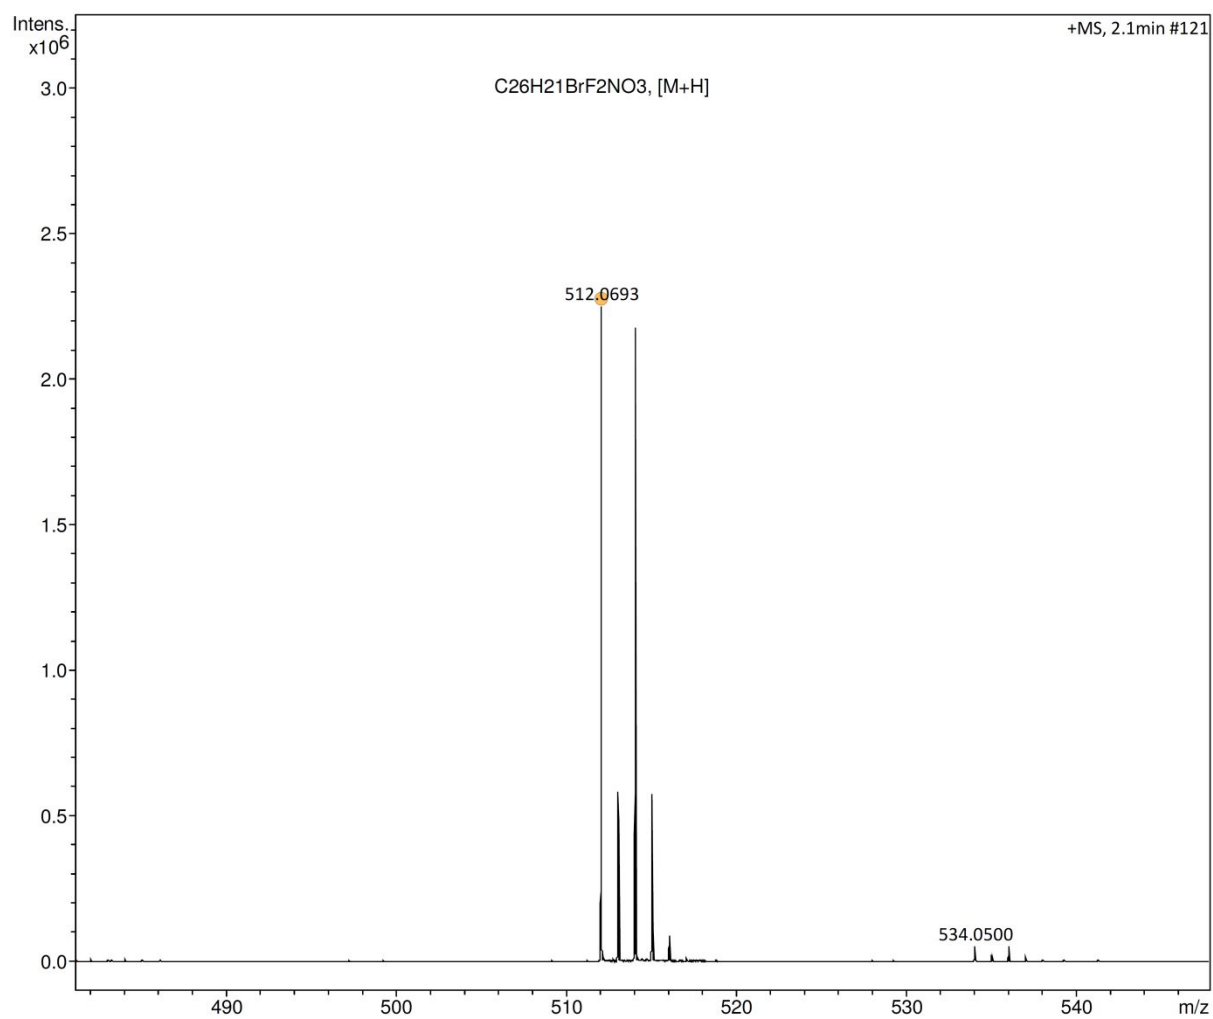

**Figure S11: HRMS** spectrum of 3-(2-(3-((4-bromobenzyl)oxy)oxetan-3-yl)-3-fluorophenoxy)-8-fluoro-2-methylquinoline, **9b**

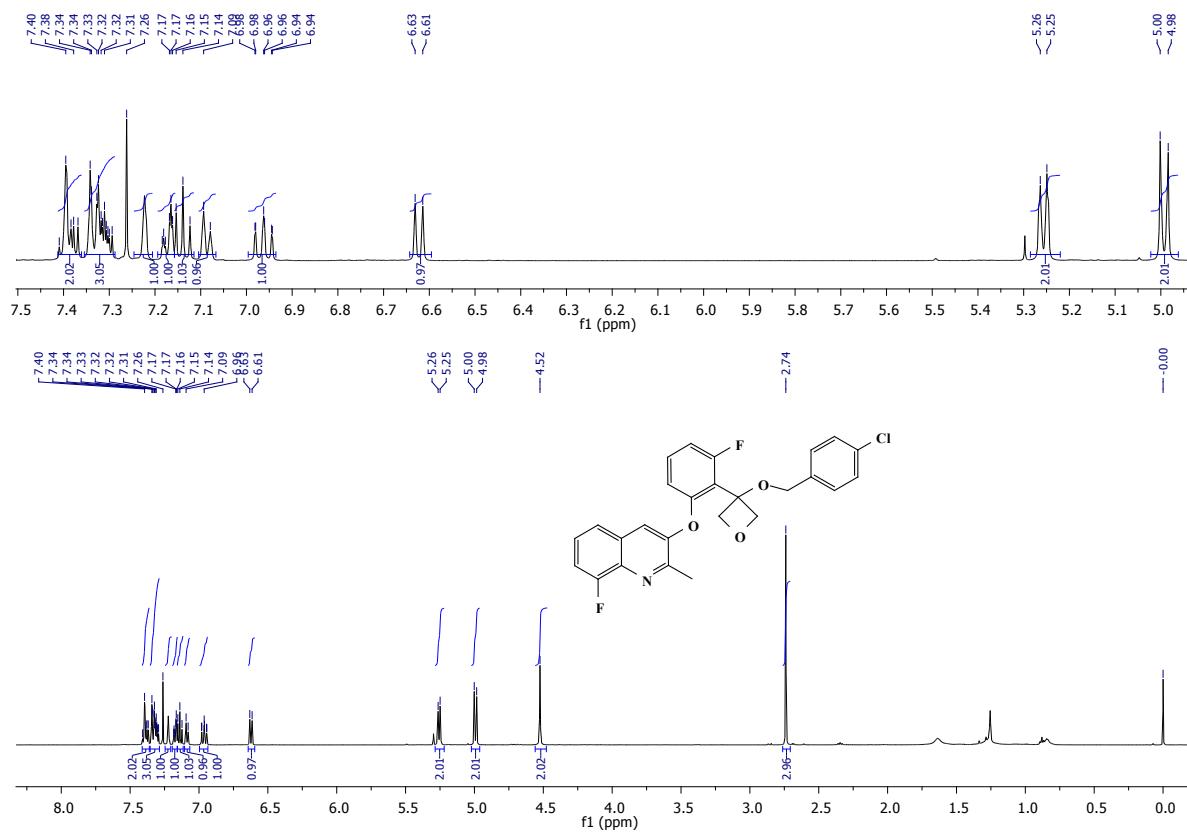

**Figure S12:** <sup>1</sup>H NMR (500 MHz, CDCl<sub>3</sub>) spectrum of 3-(2-(3-((4-chlorobenzyl)oxy)oxetan-3-yl)-3-fluorophenoxy)-8-fluoro-2-methylquinoline, **9c**

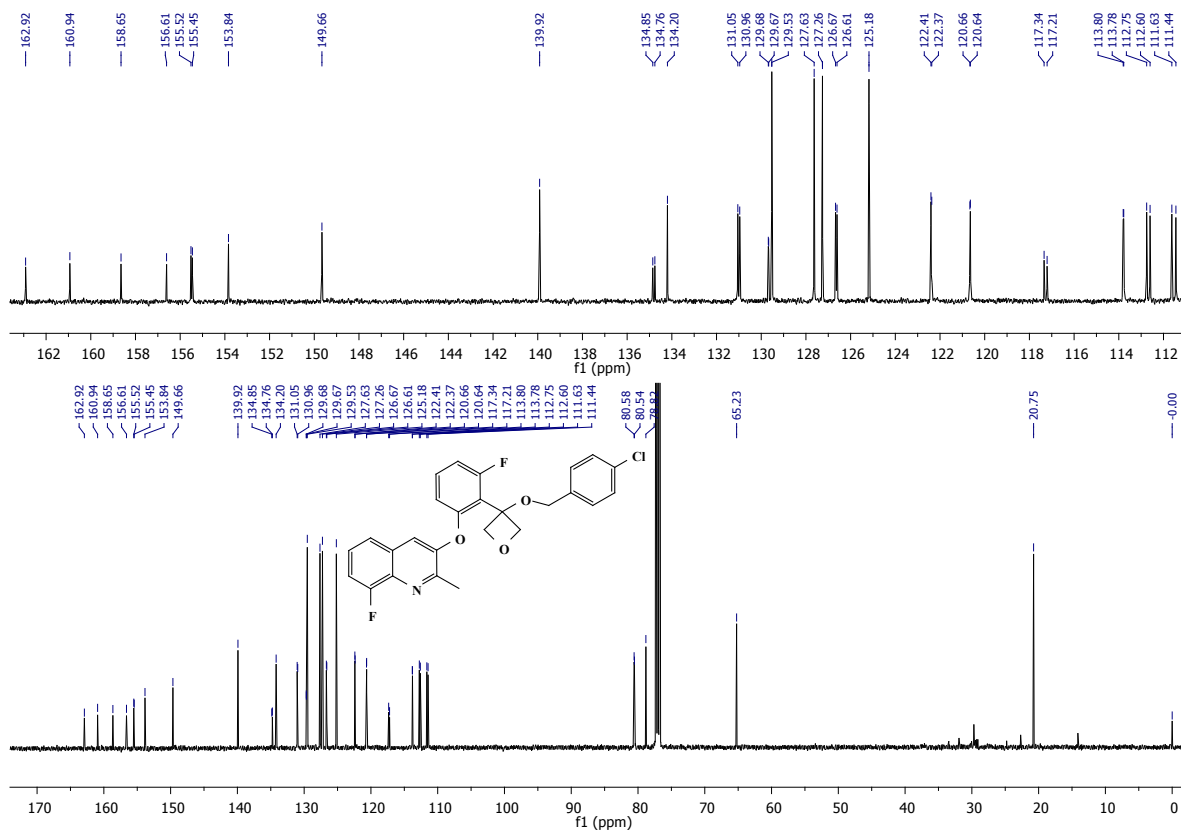

**Figure S13:** <sup>13</sup>C NMR (126 MHz, CDCl<sub>3</sub>) spectrum of 3-(2-(3-(4-chlorobenzyl)oxy)oxetan-3-yl)-3-fluorophenoxy)-8-fluoro-2-methylquinoline, **9c**

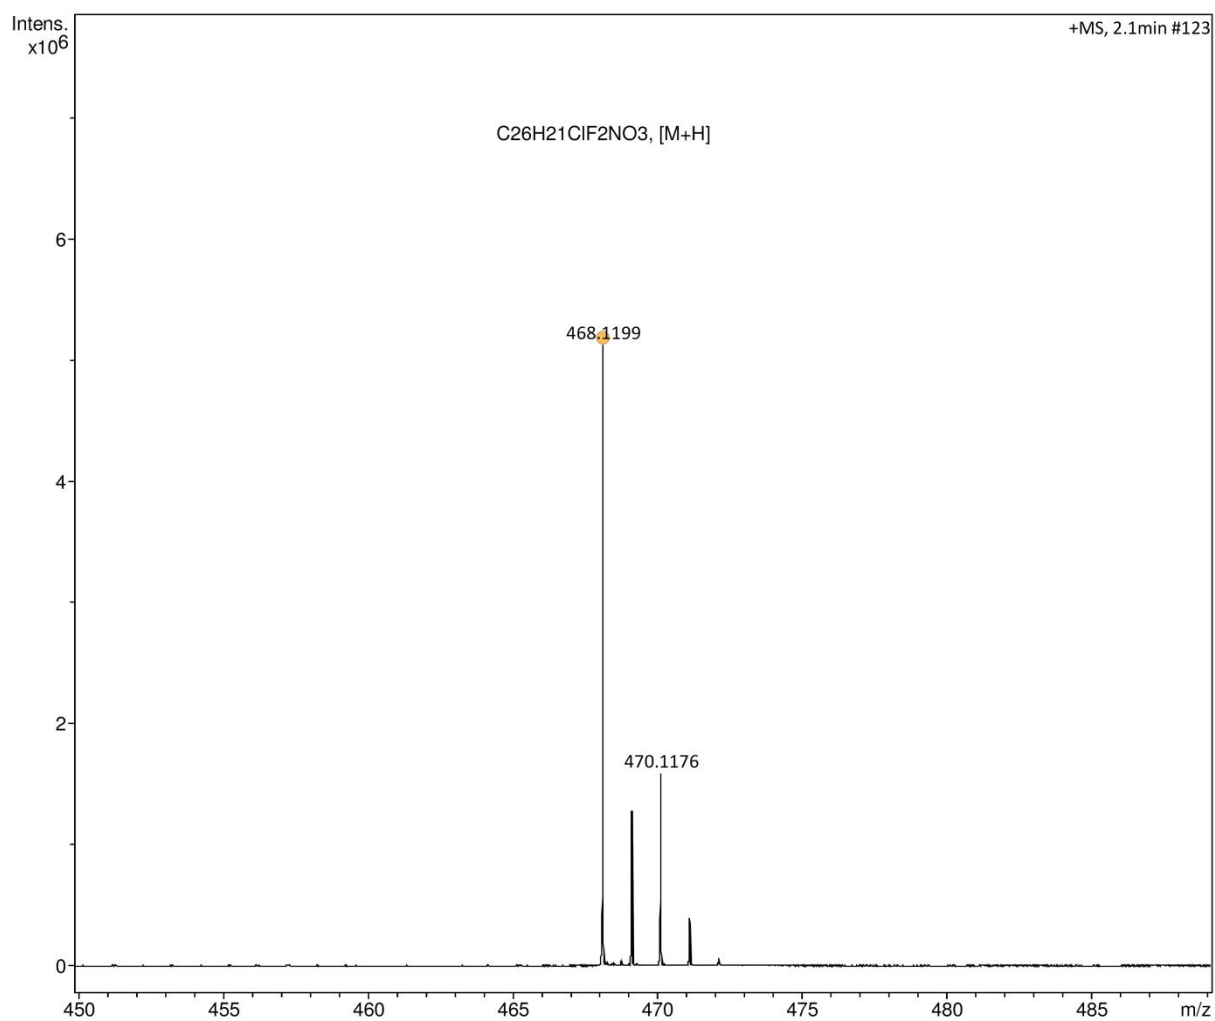

**Figure S14:** HRMS spectrum of 3-(2-(3-((4-chlorobenzyl)oxy)oxetan-3-yl)-3-fluorophenoxy)-8-fluoro-2-methylquinoline, **9c**

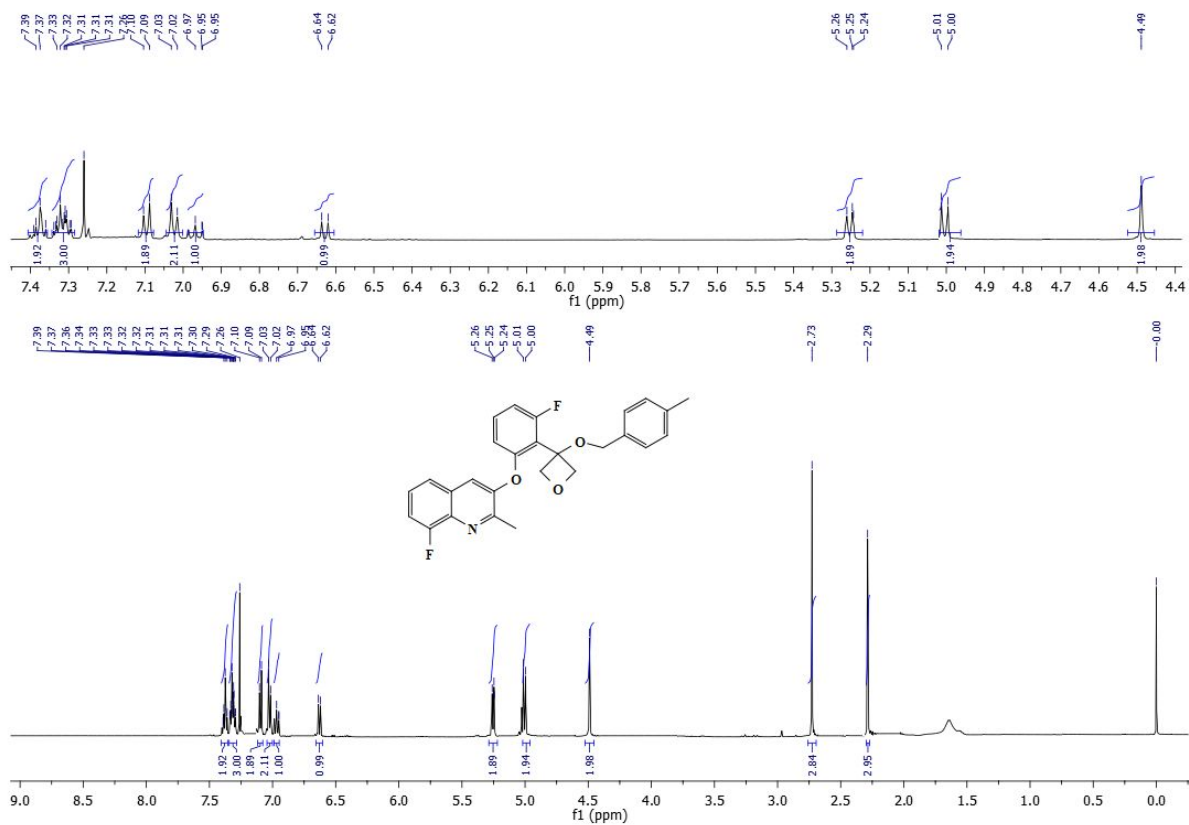

**Figure S15:**  $^1\text{H}$  NMR (500 MHz,  $\text{CDCl}_3$ ) spectrum of 8-fluoro-3-(3-fluoro-2-(3-((4-methylbenzyl)oxy)oxetan-3-yl)phenoxy)-2-methylquinoline, **9d**

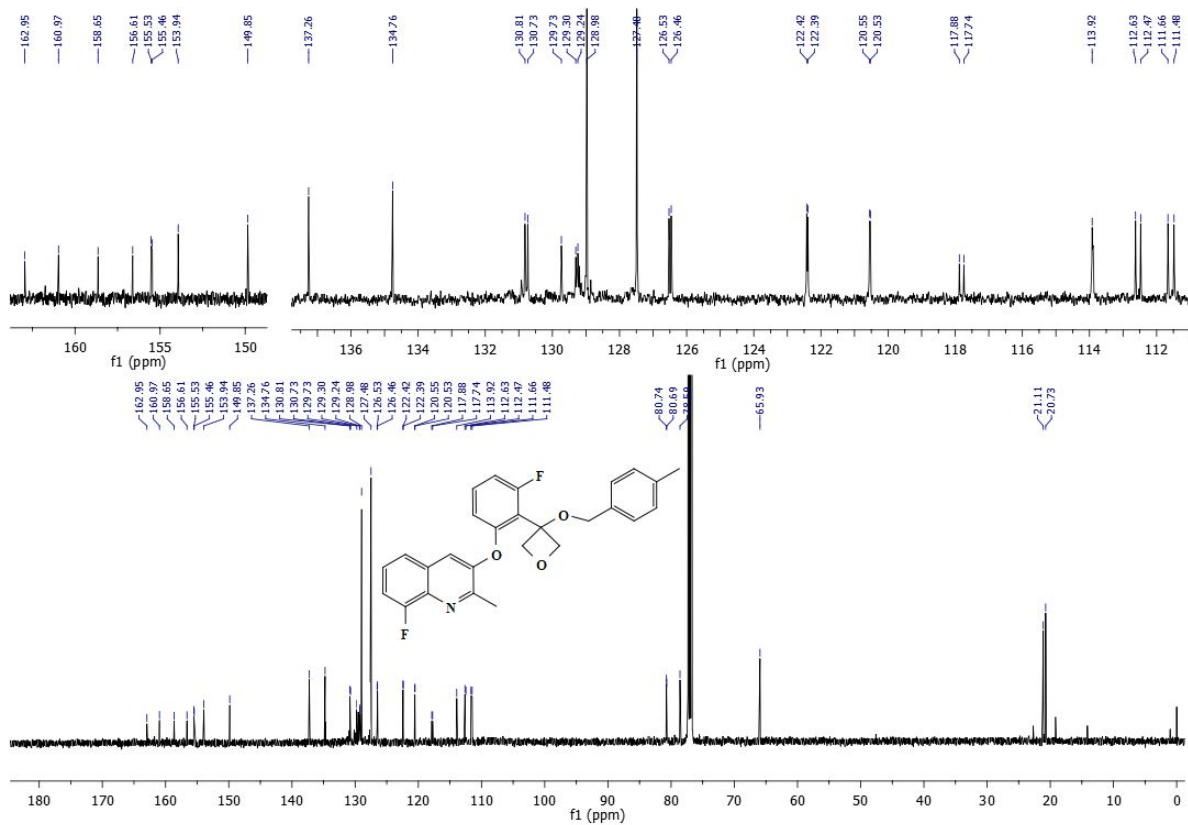

**Figure S16:** <sup>13</sup>C NMR (126 MHz, CDCl<sub>3</sub>) spectrum of 8-fluoro-3-(3-fluoro-2-(3-((4-methylbenzyl)oxy)oxetan-3-yl)phenoxy)-2-methylquinoline, **9d**



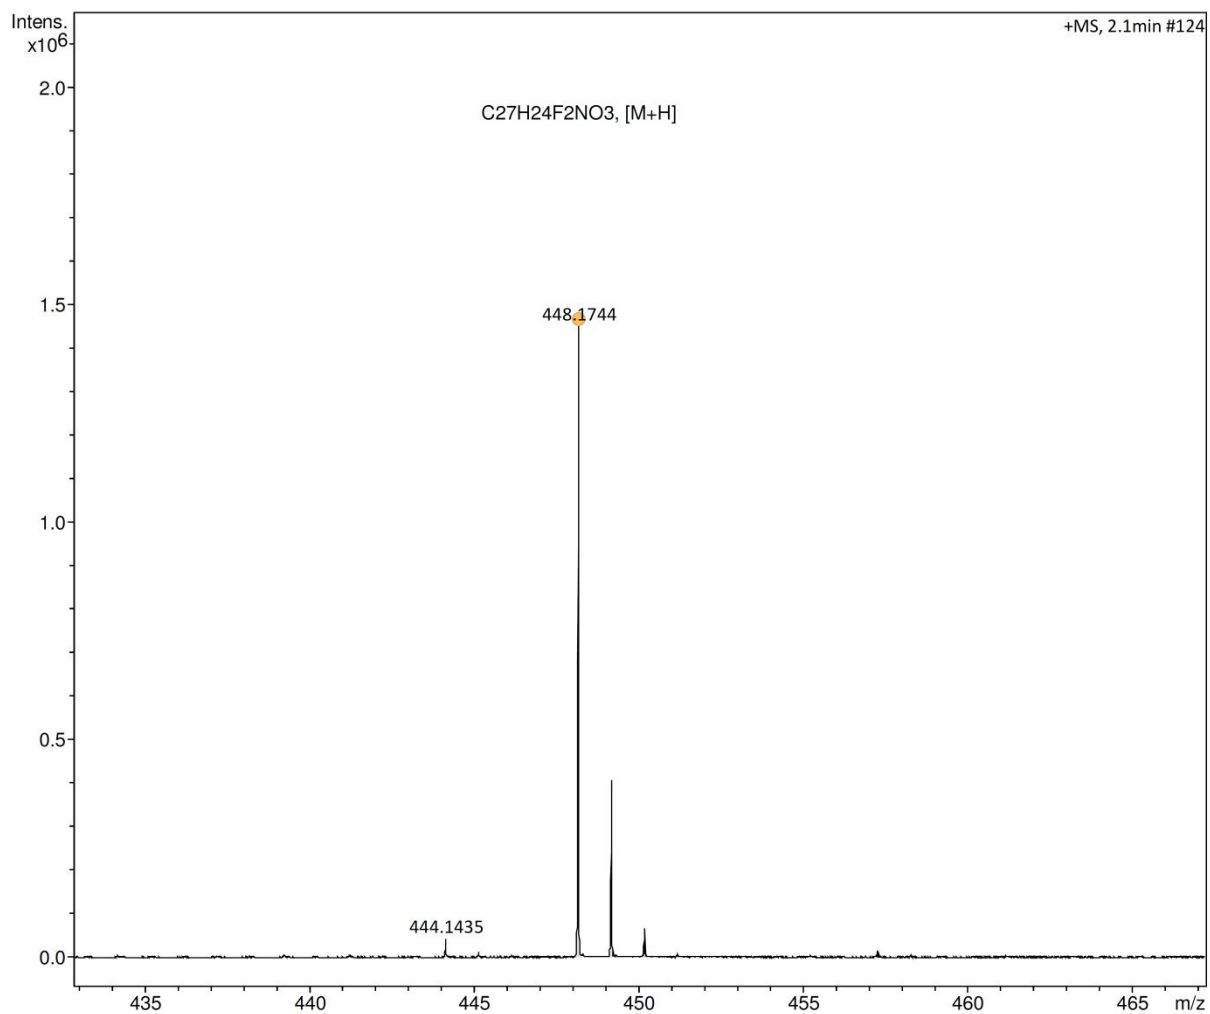

**Figure S17:** HRMS spectrum of 8-fluoro-3-(3-fluoro-2-(3-((4-methylbenzyl)oxy)oxetan-3-yl)phenoxy)-2-methylquinoline, **9d**

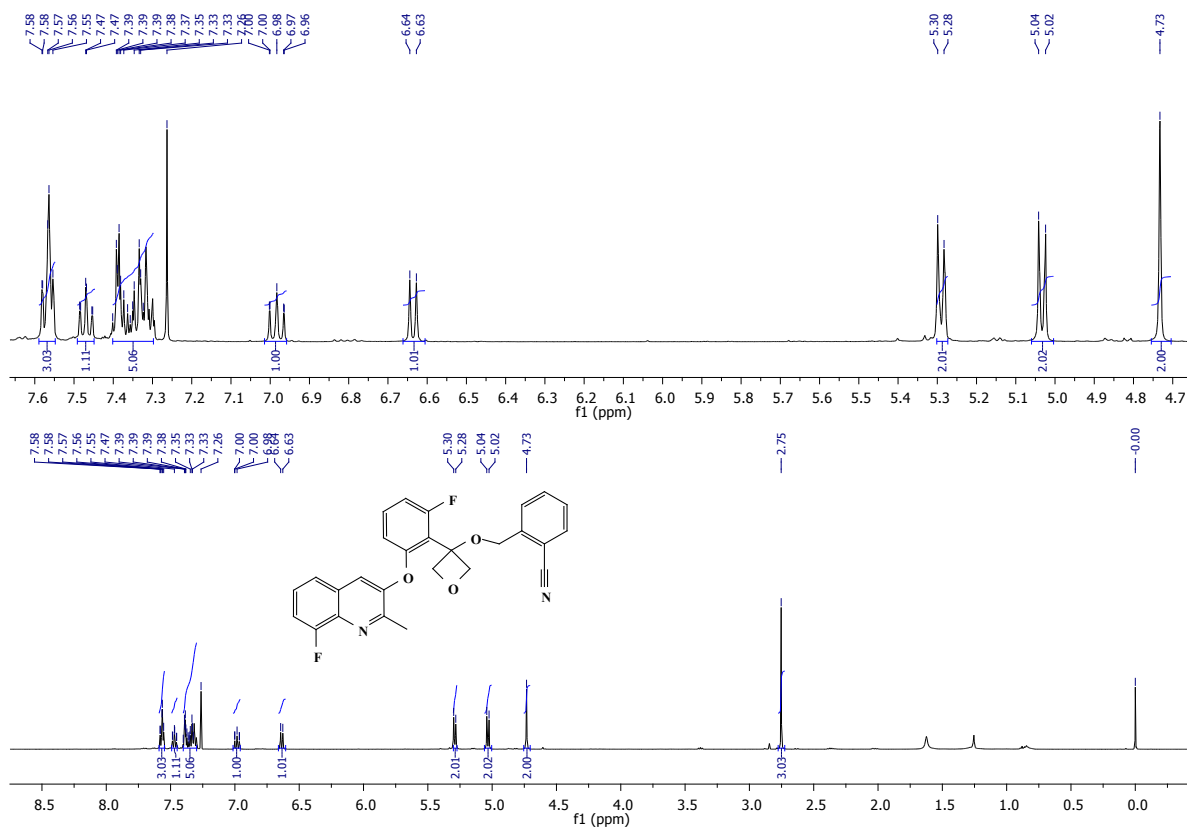

**Figure S18:** <sup>1</sup>H NMR (500 MHz, CDCl<sub>3</sub>) spectrum of 2-(((3-(2-fluoro-6-((8-fluoro-2-methylquinolin-3-yl)oxy)phenyl)oxetan-3-yl)oxy)methyl)benzonitrile, **9e**

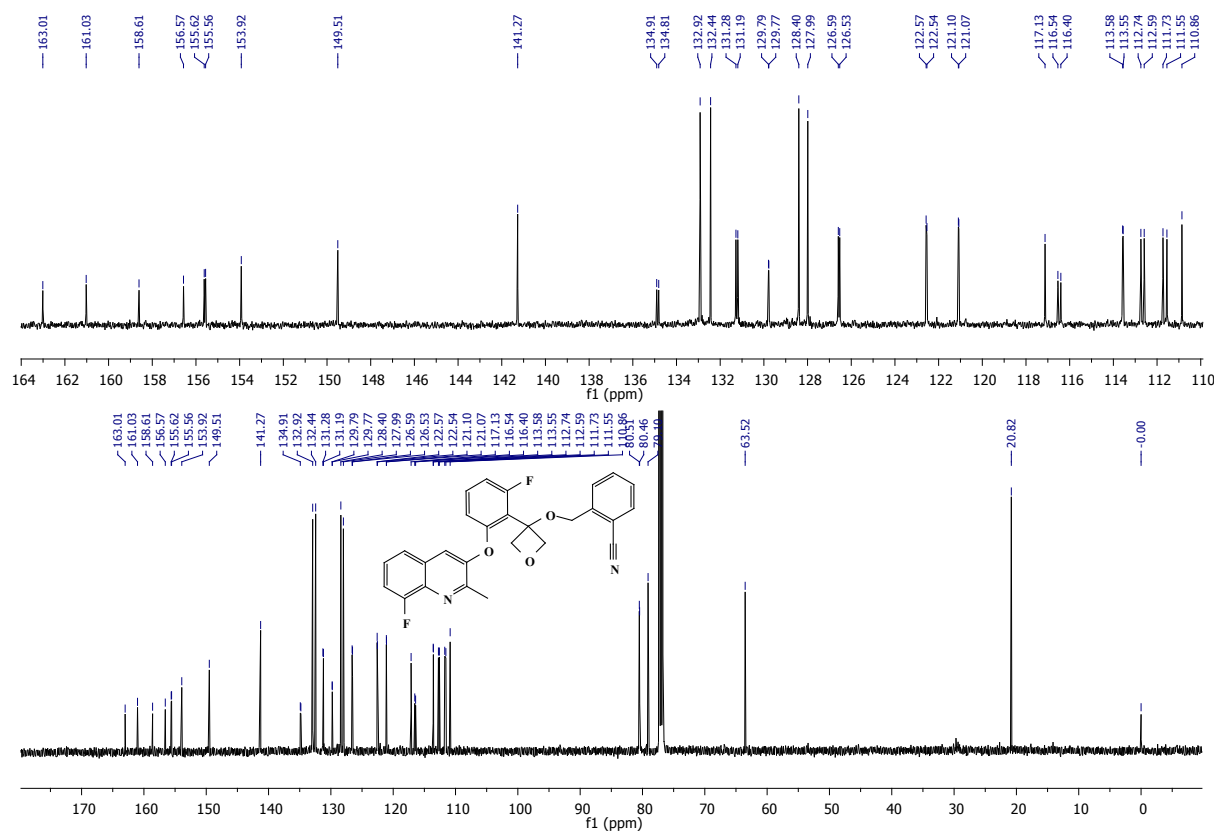

**Figure S19:** <sup>13</sup>C NMR (126 MHz, CDCl<sub>3</sub>) spectrum of 2-(((3-(2-fluoro-6-((8-fluoro-2-methylquinolin-3-yl)oxy)phenyl)oxetan-3-yl)oxy)methyl)benzonitrile, **9e**

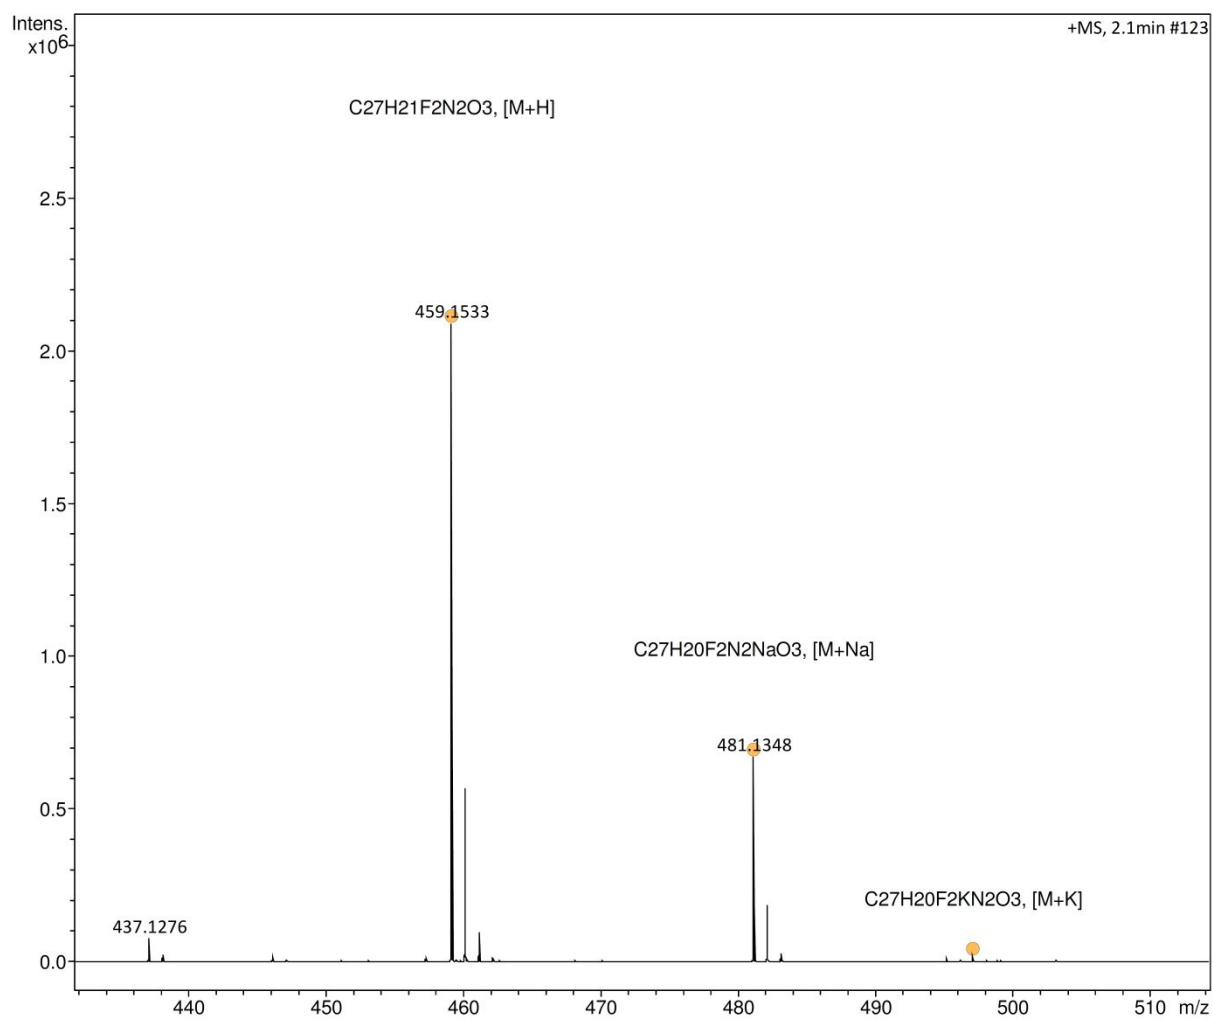

**Figure S20:** HRMS spectrum of 2-(((3-(2-fluoro-6-((8-fluoro-2-methylquinolin-3-yl)oxy)phenyl)oxetan-3-yl)oxy)methyl)benzotrile, **9e**

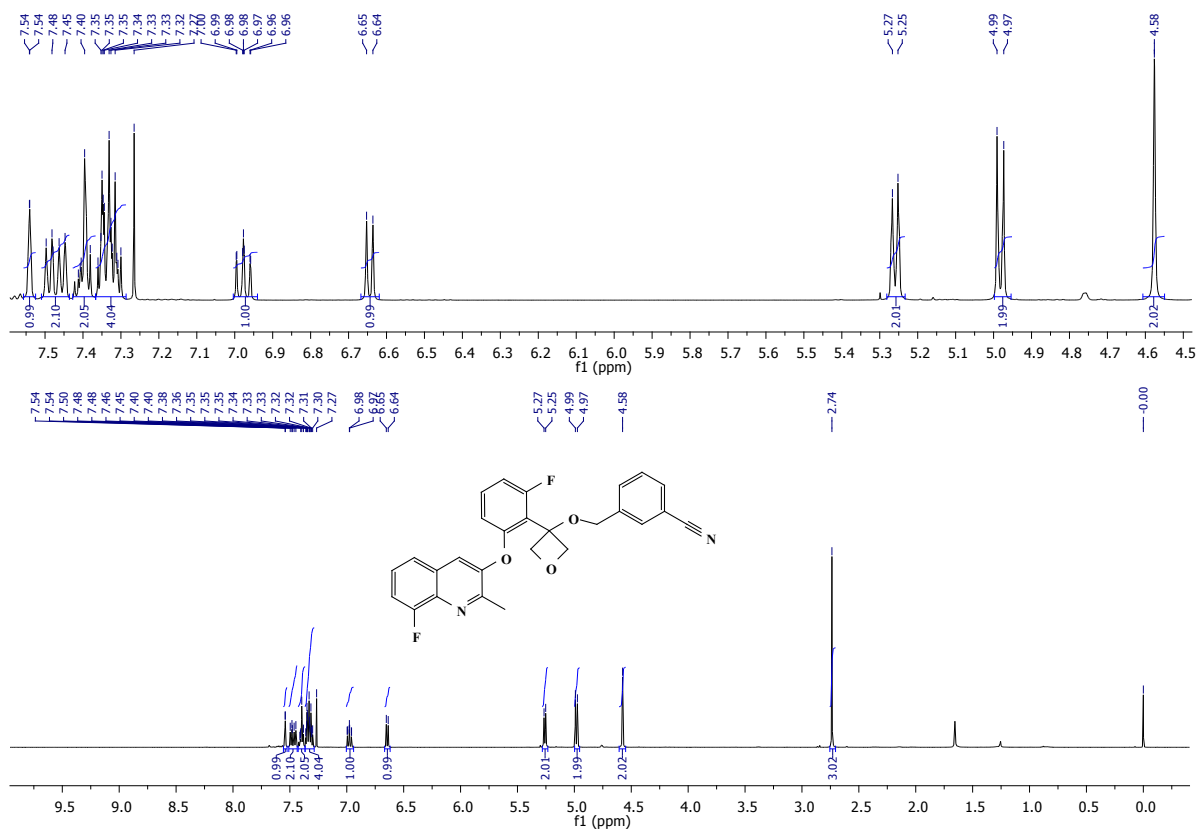

**Figure S21:** <sup>1</sup>H NMR (500 MHz, CDCl<sub>3</sub>) spectrum of 3-(((3-(2-fluoro-6-((8-fluoro-2-methylquinolin-3-yl)oxy)phenyl)oxetan-3-yl)oxy)methyl)benzonitrile, **9f**

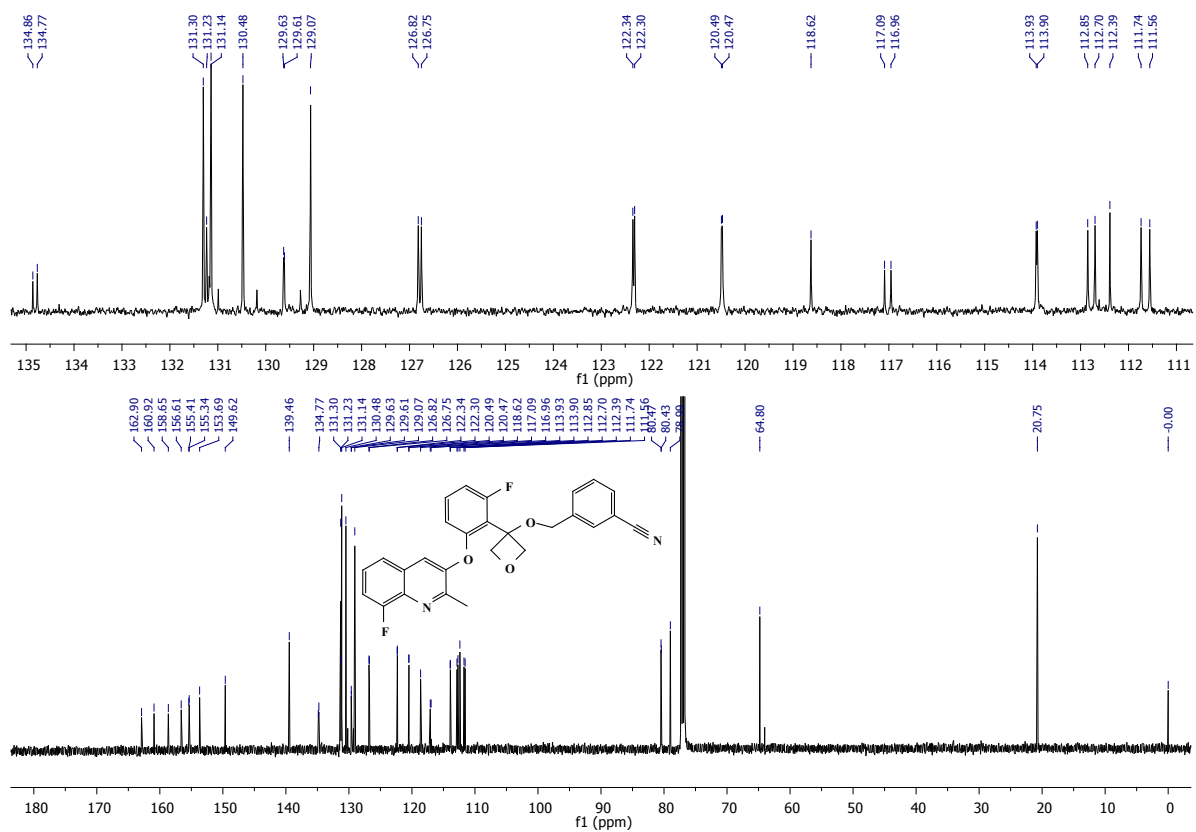

**Figure S22:**  $^{13}\text{C}$  NMR (126 MHz,  $\text{CDCl}_3$ ) spectrum of 3-(((3-(2-fluoro-6-((8-fluoro-2-methylquinolin-3-yl)oxy)phenyl)oxetan-3-yl)oxy)methyl)benzonitrile, **9f**

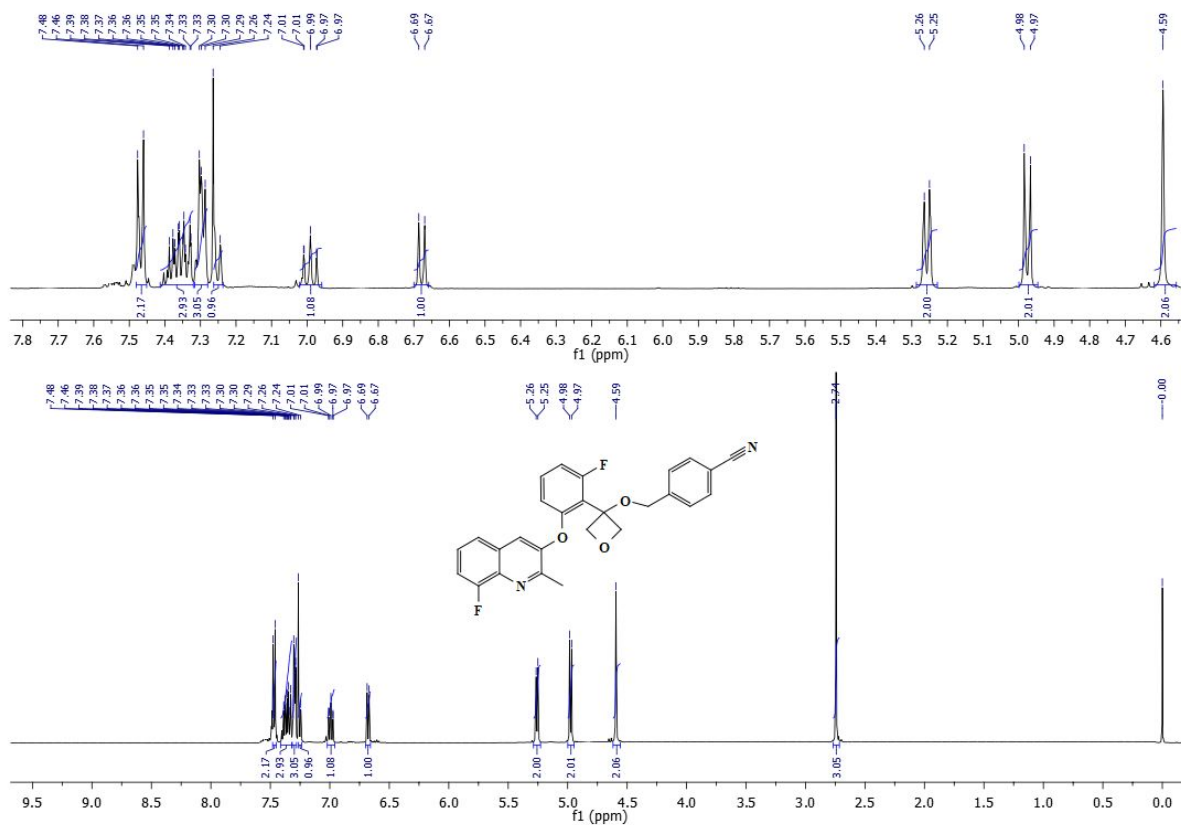

**Figure S23:** <sup>1</sup>H NMR (500 MHz, CDCl<sub>3</sub>) spectrum of 4-(((3-(2-fluoro-6-((8-fluoro-2-methylquinolin-3-yl)oxy)phenyl)oxetan-3-yl)oxy)methyl)benzonitrile, **9g**

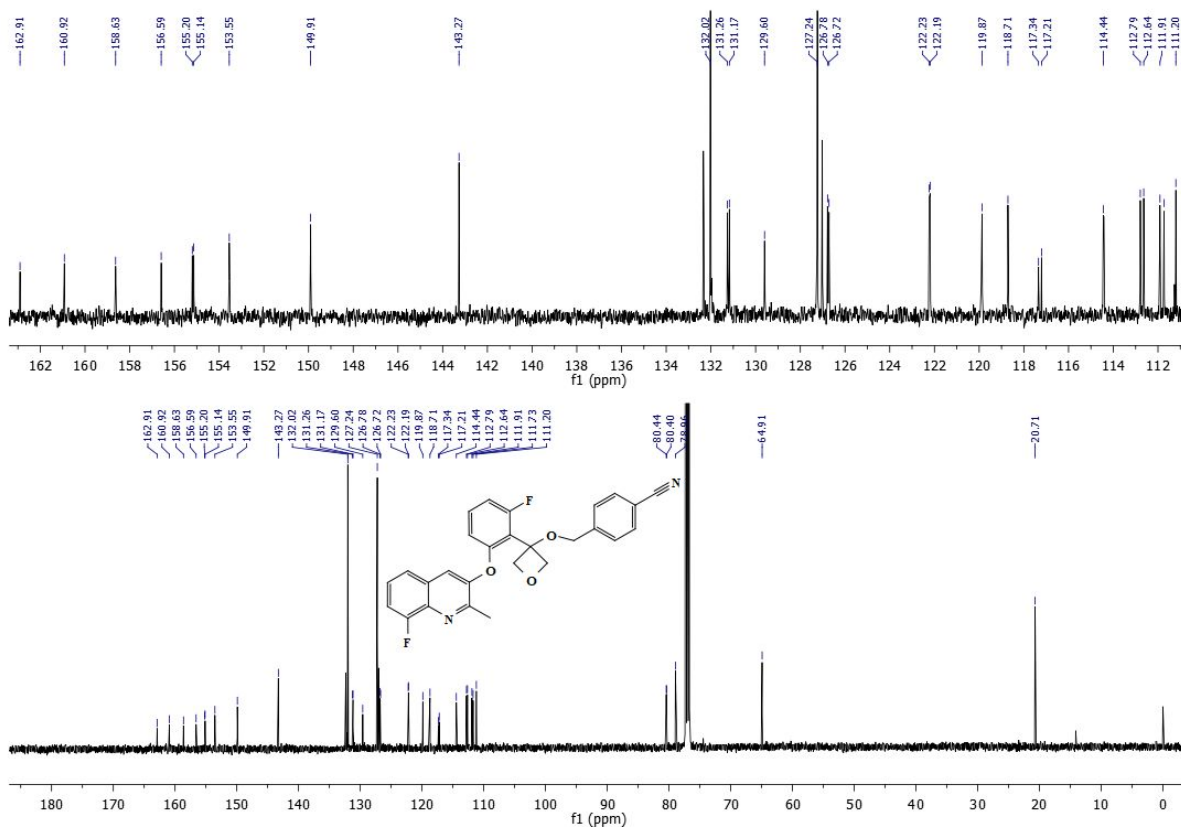



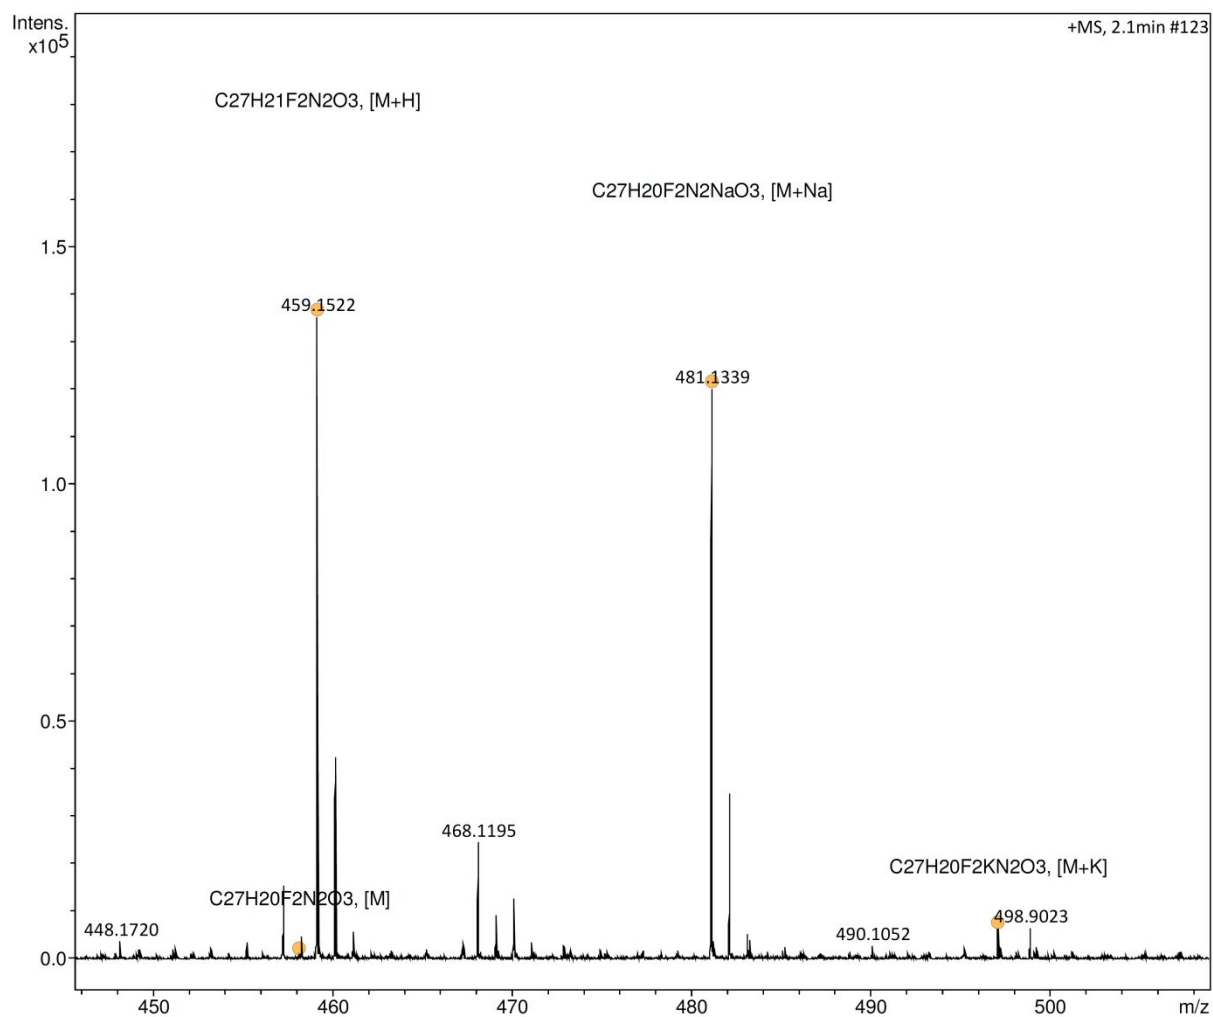

**Figure S25:** HRMS spectrum of 4-(((3-(2-fluoro-6-((8-fluoro-2-methylquinolin-3-yl)oxy)phenyl)oxetan-3-yl)oxy)methyl)benzotrile, **9g**

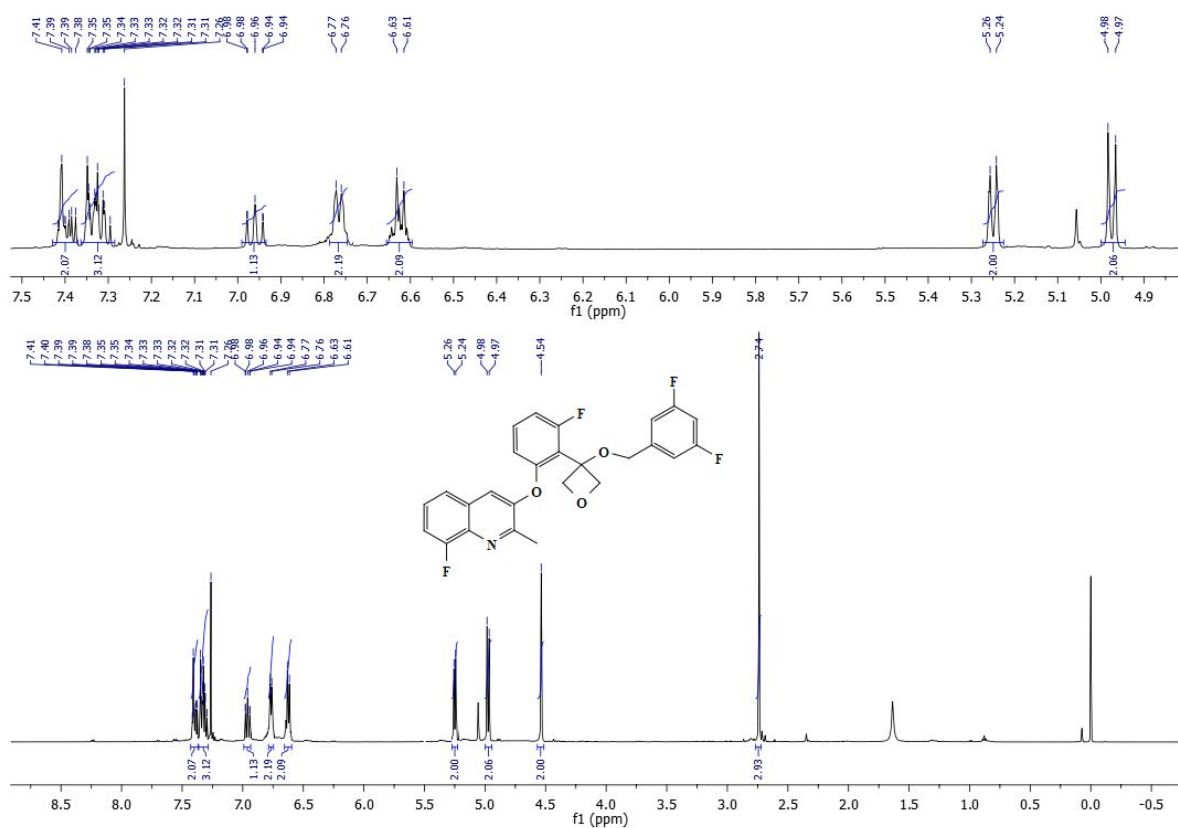

**Figure S26:**  $^1\text{H}$  NMR (500 MHz,  $\text{CDCl}_3$ ) spectrum of 3-(2-(3-((3,5-difluorobenzyl)oxy)oxetan-3-yl)-3-fluorophenoxy)-8-fluoro-2-methylquinoline, **9h**

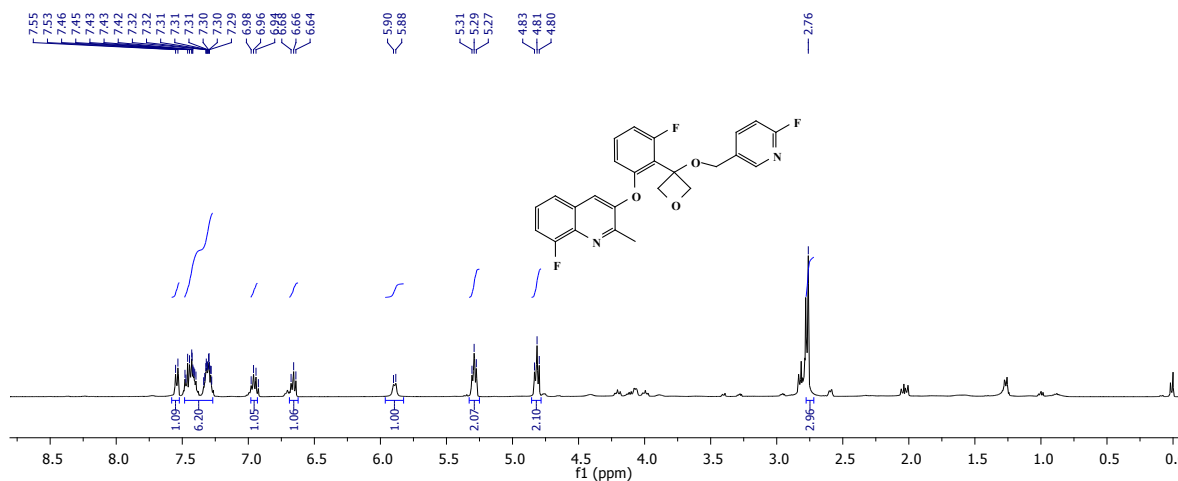

**Figure S27:**  $^1\text{H}$  NMR (500 MHz,  $\text{CDCl}_3$ ) spectrum of 8-fluoro-3-(3-fluoro-2-(3-((6-fluoropyridin-3-yl)methoxy)oxetan-3-yl)phenoxy)-2-methylquinoline, **9i**

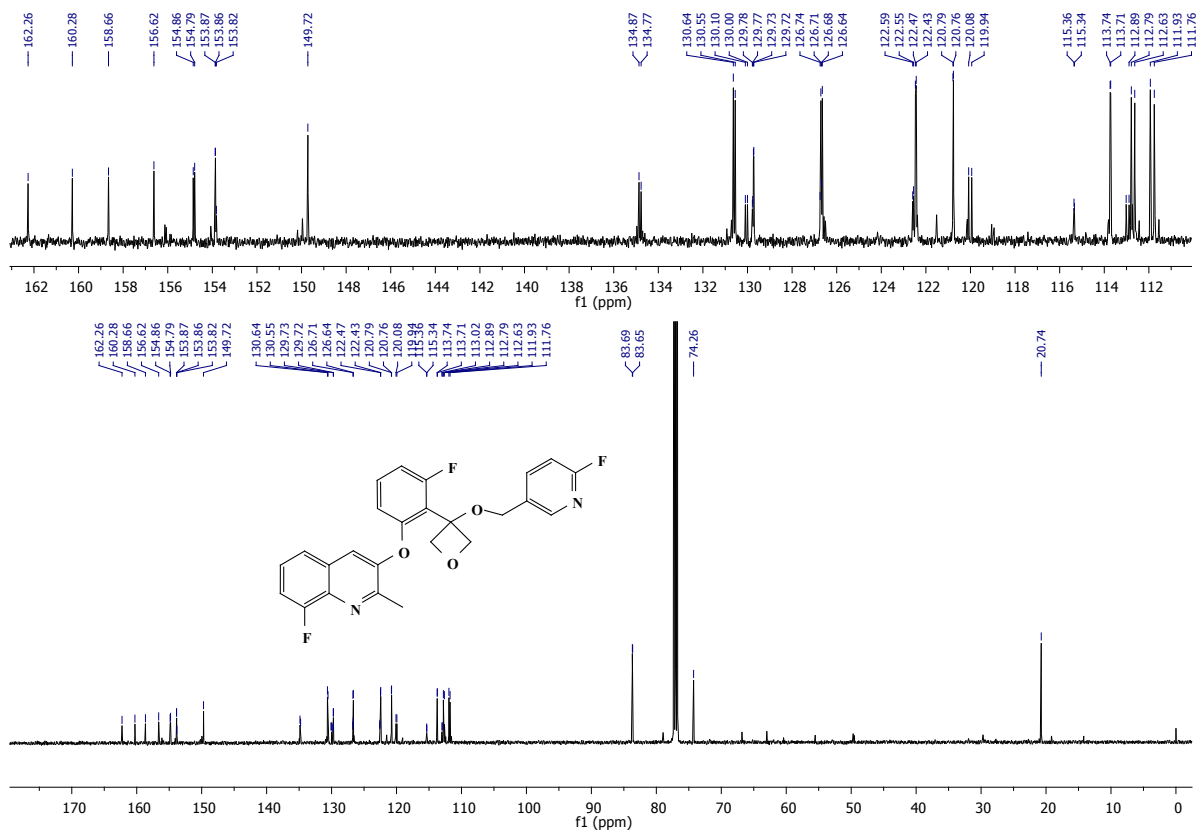

**Figure S28:** <sup>13</sup>C NMR (126 MHz, CDCl<sub>3</sub>) spectrum of 8-fluoro-3-(3-fluoro-2-(3-((6-fluoropyridin-3-yl)methoxy)oxetan-3-yl)phenoxy)-2-methylquinoline, **9i**
